# Supplementary material for: Valve‐in‐Valve for Degenerated Transcatheter Aortic Valve Replacement Versus Valve‐in‐Valve for Degenerated Surgical Aortic Bioprostheses: A 3‐Center Comparison of Hemodynamic and 1‐Year Outcome
Source: PubMed Central journal article supplement — J Am Heart Assoc. 2020 Jul 9;9(14):e013973. doi: 10.1161/JAHA.119.013973 (PMC7660709; doi:10.1161/jaha.119.013973), 2020-07-09
Supplement: JAH3-9-e013973-s001.pdf [file JAH3-9-e013973-s001.pdf]

# **SUPPLEMENTAL MATERIAL**

**Figure S1. Indication for Valve-in-Valve after Exclusion of PVL-Patients.**

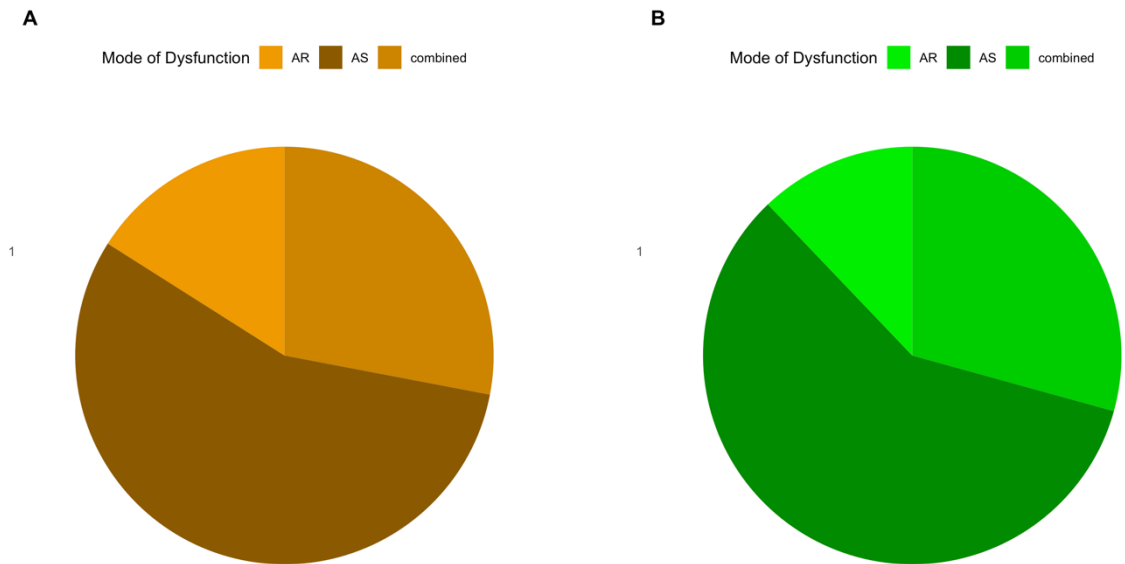

Distribution of Indication for ViTAVR (n=25). B, Distribution of Indication for ViSAVR (n=74). ViTAVR=Valve-In-valve for failed Transcatheter Aortic Valve Replacement, ViSAVR: Valve-In-valve for failed Surgical Aortic Valve Replacement, AR= Aortic Regurgitation; AS=Aortic Stenosis.

**Figure S2. Valve-in-Valve Devices Used. Legend: Relative frequencies of Valve-in-Valve Devices for ViSAVR (left) and ViTAVR (right).**

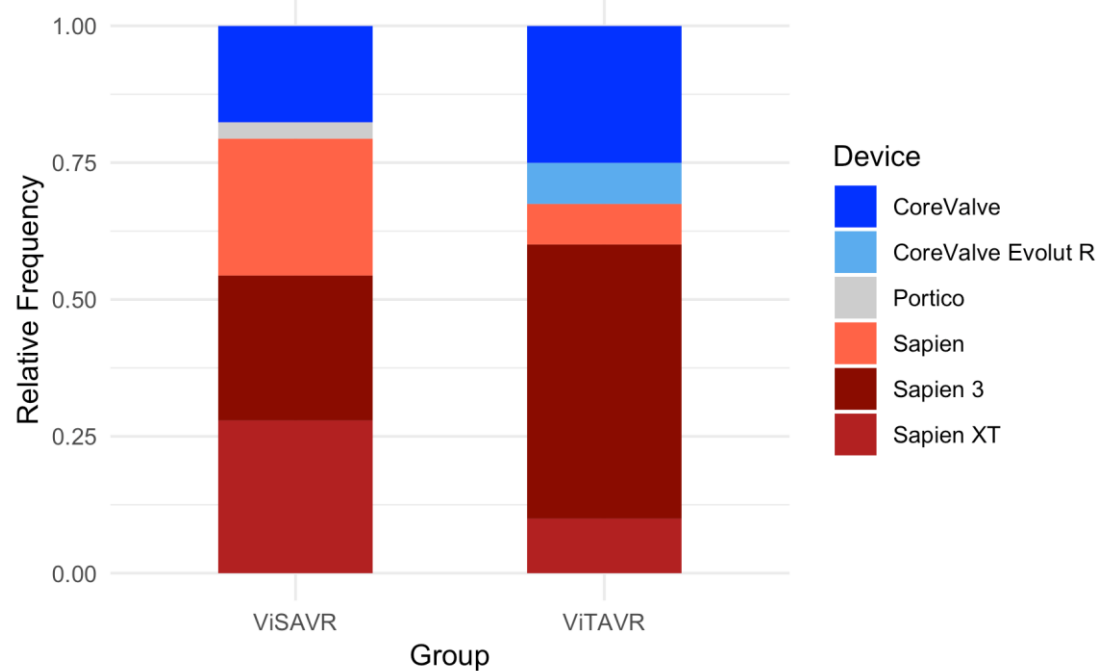

**Figure S3. Hemodynamic Outcome Depending on Size of Index Prosthesis. Legend: Hemodynamic Outcome at 30 Days following valve-in-valve for large (left, >19mm true internal diameter) versus small (right) index SAVR devices in the ViSAVR group.**

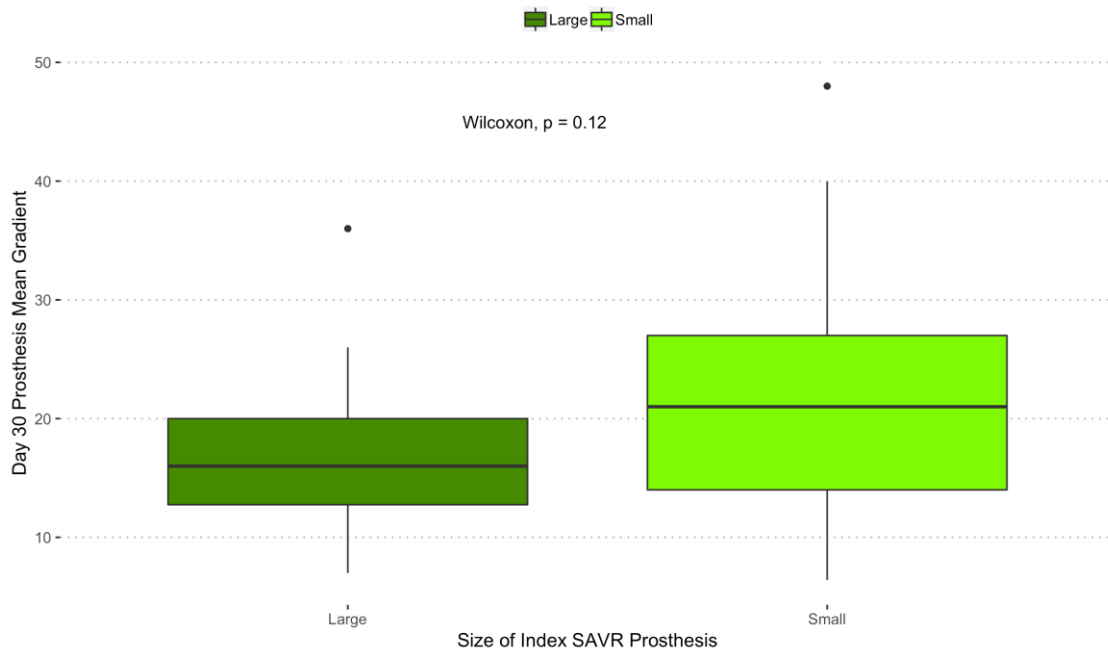

SAVR: Surgical Aortic Valve Replacement, Dark Green: Large SAVR Prosthesis, Light Green=Small SAVR Prosthesis.
